# Supplementary material for: Development and External Validation of Machine Learning Models for Diabetic Microvascular Complications: Cross-Sectional Study With Metabolites
Source: PubMed Central journal article supplement (PMC11009843; doi:10.2196/41065), 2024-03-28
Supplement: jmir_v26i1e41065_app1.pdf [file jmir_v26i1e41065_app1.pdf]

| 19 risk factors          |                         |                                 |                                  |                                |                      |
|--------------------------|-------------------------|---------------------------------|----------------------------------|--------------------------------|----------------------|
| Age                      | Alcohol consumption     | Anti-cholesterol medication use | Anti-hypertensive medication use | Random blood glucose           | Body mass index      |
| Diastolic blood pressure | Systolic blood pressure | Cholesterol                     | HDL cholesterol                  | Cardiovascular disease history | Duration of diabetes |
| Sex                      | Glycated hemoglobin %   | Hypertension                    | Insulin use                      | LDL cholesterol                | Pulse pressure       |
| Current smoker           |                         |                                 |                                  |                                |                      |
| 220 metabolites          |                         |                                 |                                  |                                |                      |
| AcAce                    | LA                      | L-VLDL-P                        | M-VLDL-L                         | S-LDL-TG%                      | XL-VLDL-C%           |
| Ace                      | Lac                     | L-VLDL-PL                       | M-VLDL-P                         | SM                             | XL-VLDL-CE           |
| Ala                      | LAFA                    | L-VLDL-PL%                      | M-VLDL-PL                        | S-VLDL-C                       | XL-VLDL-CE%          |
| Alb                      | LDL-D                   | L-VLDL-TG                       | M-VLDL-PL%                       | S-VLDL-C%                      | XL-VLDL-FC           |
| ApoA1                    | LDL-TG                  | L-VLDL-TG%                      | M-VLDL-TG                        | S-VLDL-CE                      | XL-VLDL-FC%          |
| ApoB                     | Leu                     | M-HDL-C                         | M-VLDL-TG%                       | S-VLDL-CE%                     | XL-VLDL-L            |
| ApoBApoA1                | L-HDL-C                 | M-HDL-C%                        | PC                               | S-VLDL-FC                      | XL-VLDL-P            |
| boHBut                   | L-HDL-C%                | M-HDL-CE                        | Phe                              | S-VLDL-FC%                     | XL-VLDL-PL           |
| Cit                      | L-HDL-CE                | M-HDL-CE%                       | PUFA                             | S-VLDL-L                       | XL-VLDL-PL%          |
| DHA                      | L-HDL-CE%               | M-HDL-FC                        | PUFAFA                           | S-VLDL-P                       | XL-VLDL-TG           |
| DHAFA                    | L-HDL-FC                | M-HDL-FC%                       | RemnantC                         | S-VLDL-PL                      | XL-VLDL-TG%          |
| EstC                     | L-HDL-FC%               | M-HDL-L                         | SerumTG                          | S-VLDL-PL%                     | XS-VLDL-C            |
| FAw3                     | L-HDL-L                 | M-HDL-P                         | SFA                              | S-VLDL-TG                      | XS-VLDL-C%           |
| FAw3FA                   | L-HDL-P                 | M-HDL-PL                        | SFAFA                            | S-VLDL-TG%                     | XS-VLDL-CE           |
| FAw6                     | L-HDL-PL                | M-HDL-PL%                       | S-HDL-C                          | TGPG                           | XS-VLDL-CE%          |
| FAw6FA                   | L-HDL-PL%               | M-HDL-TG                        | S-HDL-C%                         | TotCho                         | XS-VLDL-FC           |
| FreeC                    | L-HDL-TG                | M-HDL-TG%                       | S-HDL-CE                         | TotFA                          | XS-VLDL-FC%          |
| Gln                      | L-HDL-TG%               | M-LDL-C                         | S-HDL-CE%                        | TotPG                          | XS-VLDL-L            |
| Gp                       | L-LDL-C                 | M-LDL-C%                        | S-HDL-FC                         | Tyr                            | XS-VLDL-P            |
| HDL-2C                   | L-LDL-C%                | M-LDL-CE                        | S-HDL-FC%                        | UnSat                          | XS-VLDL-PL           |
| HDL-3C                   | L-LDL-CE                | M-LDL-CE%                       | S-HDL-L                          | Val                            | XS-VLDL-PL%          |
| HDL-D                    | L-LDL-CE%               | M-LDL-FC                        | S-HDL-P                          | VLDL-C                         | XS-VLDL-TG           |
| HDL-TG                   | L-LDL-FC                | M-LDL-FC%                       | S-HDL-PL                         | VLDL-D                         | XS-VLDL-TG%          |
| His                      | L-LDL-FC%               | M-LDL-L                         | S-HDL-PL%                        | VLDL-TG                        | XXL-VLDL-C           |
| IDL-C                    | L-LDL-L                 | M-LDL-P                         | S-HDL-TG                         | XL-HDL-C                       | XXL-VLDL-C%          |
| IDL-C%                   | L-LDL-P                 | M-LDL-PL                        | S-HDL-TG%                        | XL-HDL-C%                      | XXL-VLDL-CE          |
| IDL-CE                   | L-LDL-PL                | M-LDL-PL%                       | S-LDL-C                          | XL-HDL-CE                      | XXL-VLDL-CE%         |
| IDL-CE%                  | L-LDL-PL%               | M-LDL-TG                        | S-LDL-C%                         | XL-HDL-CE%                     | XXL-VLDL-FC          |
| IDL-FC                   | L-LDL-TG                | M-LDL-TG%                       | S-LDL-CE                         | XL-HDL-FC                      | XXL-VLDL-FC%         |
| IDL-FC%                  | L-LDL-TG%               | MUFA                            | S-LDL-CE%                        | XL-HDL-FC%                     | XXL-VLDL-L           |

|         |            |            |           |            |              |
|---------|------------|------------|-----------|------------|--------------|
| IDL-L   | LVLDL-C    | MUFAFA     | S-LDL-FC  | XL-HDL-L   | XXL-VLDL-P   |
| IDL-P   | L-VLDL-C%  | M-VLDL-C   | S-LDL-FC% | XL-HDL-P   | XXL-VLDL-PL  |
| IDL-PL  | L-VLDL-CE  | M-VLDL-C%  | S-LDL-L   | XL-HDL-PL  | XXL-VLDL-PL% |
| IDL-PL% | L-VLDL-CE% | M-VLDL-CE  | S-LDL-P   | XL-HDL-PL% | XXL-VLDL-TG  |
| IDL-TG  | L-VLDL-FC  | M-VLDL-CE% | S-LDL-PL  | XL-HDL-TG  | XXL-VLDL-TG% |
| IDL-TG% | L-VLDL-FC% | M-VLDL-FC  | S-LDL-PL% | XL-HDL-TG% |              |
| Ile     | L-VLDL-L   | M-VLDL-FC% | S-LDL-TG  | XL-VLDL-C  |              |

\*Traditional risk factors: age, sex, systolic blood pressure, hba1c, duration of diabetes, and body mass index.

Ethnicity was not adjusted because SEED and UK Biobank had different ethnicities.

Abbreviations : DHA: Docosahexaenoic acid; LA: Linoleic acid; FA: fatty acids, MUFA: monounsaturated FA, SFA: saturated FA; XXL: extremely large, XL: very large, L: large, M: medium, S: small, XS: very small; HDL: high-density lipoprotein, IDL: intermediate-density lipoprotein, LDL: low-density lipoprotein, VLDL: very-low-density lipoprotein; C: cholesterol, CE: cholesterol esters, FC: free cholesterol, L: total lipids, PL: phospholipids, TG: triglycerides; %: metabolites to total lipids ratio;
