# Supplementary material for: Development and External Validation of Machine Learning Models for Diabetic Microvascular Complications: Cross-Sectional Study With Metabolites
Source: PubMed Central journal article supplement (PMC11009843; doi:10.2196/41065), 2024-03-28

Distribution of missing data in 239 variables of SEED

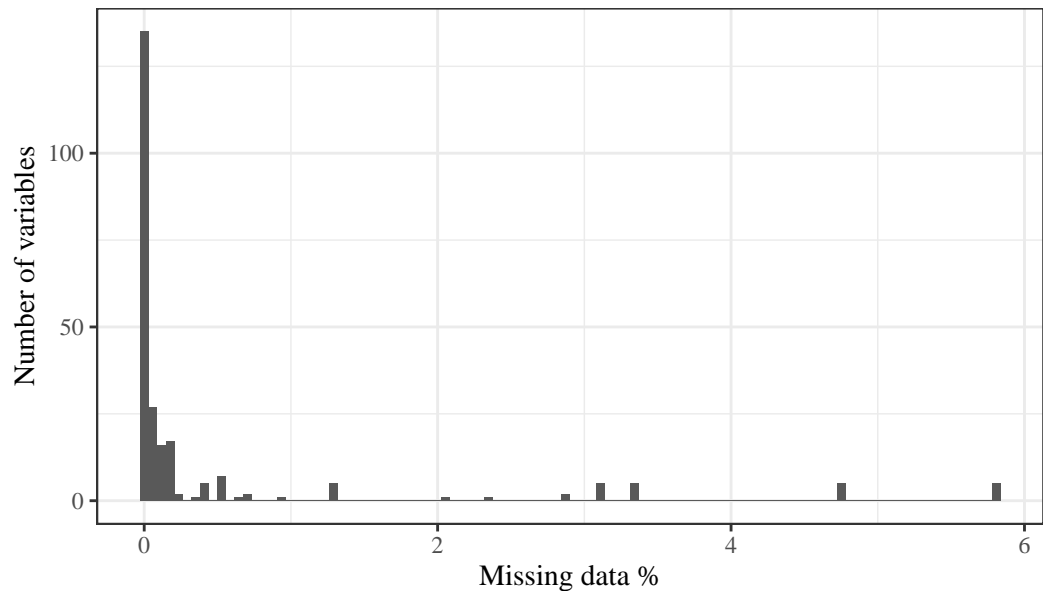

Distribution of missing data in 2,772 participants of SEED

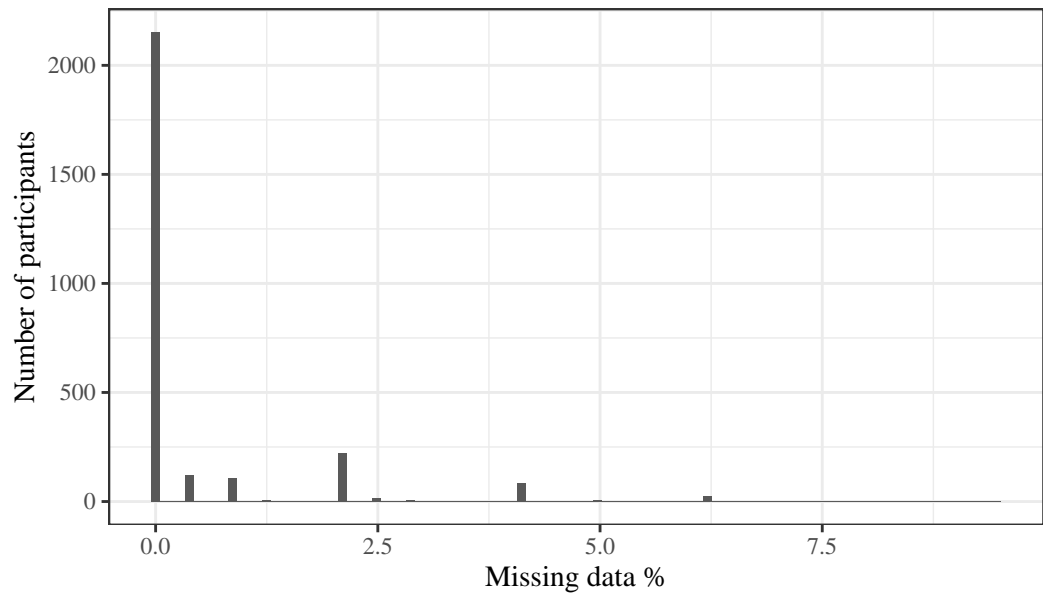

Supplement: jmir_v26i1e41065_app2.pdf [file jmir_v26i1e41065_app2.pdf]
