# Supplementary material for: Development and External Validation of Machine Learning Models for Diabetic Microvascular Complications: Cross-Sectional Study With Metabolites
Source: PubMed Central journal article supplement (PMC11009843; doi:10.2196/41065), 2024-03-28
Supplement: jmir_v26i1e41065_app4.pdf [file jmir_v26i1e41065_app4.pdf]

|                                                                            | <b>SEED</b><br><b>(n=2,772)</b> | <b>UK Biobank</b><br><b>(n=5,843)</b> | <b>P</b> |
|----------------------------------------------------------------------------|---------------------------------|---------------------------------------|----------|
| Age, median [IQR], y                                                       | 61.7 [53.5, 69.4]               | 61.0 [55.0, 65.0]                     | <.001    |
| Female, n (%)                                                              | 1,361 (49.1)                    | 2,090 (35.8)                          | <.001    |
| Ethnicity                                                                  | Malay, Indian, Chinese          | British, etc.                         | <.001    |
| Current smoker, n (%)                                                      | 377 (13.6)                      | 3,193 (54.6)                          | <.001    |
| Alcohol consumption, n (%)                                                 | 204 (7.4)                       | 5,342 (91.4)                          | <.001    |
| Duration of diabetes, median [IQR], y                                      | 3.9 [0.0, 10.7]                 | 5.0 [2.0, 10.0]                       | <.001    |
| Insulin use, n (%)                                                         | 143 (5.2)                       | 1,245 (21.3)                          | <.001    |
| Glycated hemoglobin, mean (SD), %                                          | 7.7 (1.7)                       | 7.0 (1.3)                             | <.001    |
| Random blood glucose, mean (SD), mmol/L                                    | 9.8 (4.8)                       | 7.6 (3.4)                             | <.001    |
| History of cardiovascular disease, n (%)                                   | 519 (18.7)                      | 245 (4.2)                             | <.001    |
| Hypertension, n (%)                                                        | 2,228 (80.5)                    | 4,834 (82.8)                          | .01      |
| Antihypertensive medication use, n (%) <sup>a</sup>                        | 1,474 (66.2)                    | 3,727 (89.5)                          | <.001    |
| Pulse pressure, mean (SD), mm Hg                                           | 67.1 (18.0)                     | 74.3 (13.3)                           | <.001    |
| Systolic blood pressure, mean (SD), mm Hg                                  | 145.5 (22.2)                    | 142.9 (18.2)                          | <.001    |
| Diastolic blood pressure, mean (SD), mm Hg                                 | 78.3 (10.5)                     | 81.2 (10.4)                           | <.001    |
| Anti-cholesterol medication use, n (%)                                     | 1,183 (43.6)                    | 4,479 (76.7)                          | <.001    |
| Body mass index, mean (SD), Kg/m <sup>2</sup>                              | 26.9 (4.8)                      | 31.3 (5.7)                            | <.001    |
| Serum total cholesterol, mean (SD), mmol/L                                 | 5.2 (1.2)                       | 4.5 (1.0)                             | <.001    |
| Serum high-density lipoprotein cholesterol, mean (SD), mmol/L              | 1.1 (0.3)                       | 1.2 (0.3)                             | <.001    |
| Any diabetic retinopathy, n (%)                                            | 685 (25.4)                      | 355 (6.1)                             | <.001    |
| Diabetic kidney disease, n (%)                                             | 555 (20.2)                      | 374 (6.7)                             | <.001    |
| Estimated glomerular filtration rate, mean (SD), mL/min/1.73m <sup>2</sup> | 78.9 (23.0)                     | 88.6 (17.1)                           | <.001    |

Abbreviations: SD, standard deviation; IQR, interquartile range.

Subgroups may not add up due to the presence of missing data.

<sup>a</sup> Among those with hypertension
